# Supplementary material
Source: PubMed Central journal article supplement (PMC6842117)
Supplement: NIHMS1538637-supplement-1.pdf [file NIHMS1538637-supplement-1.pdf]

Figure S1

**A**

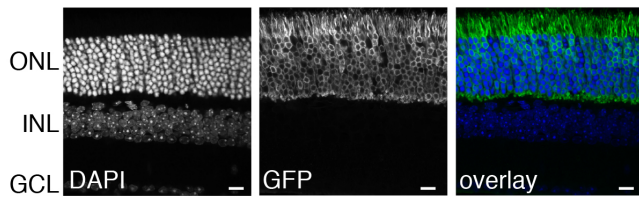

**B**

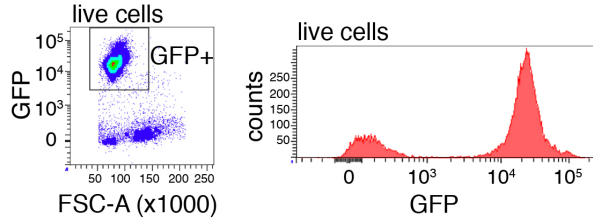

**D**

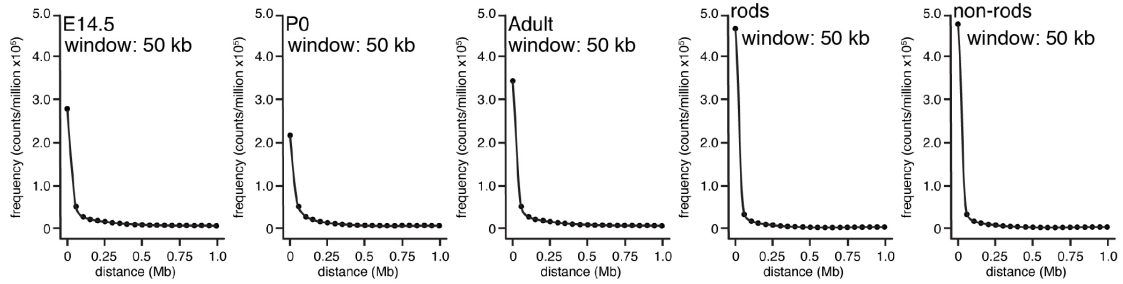

**E**

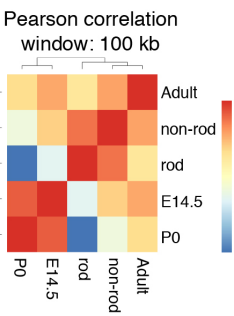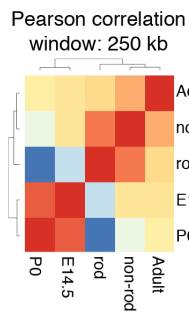

**F**

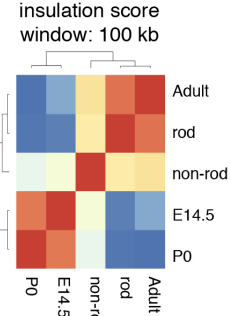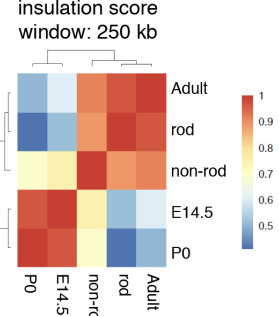

**G**

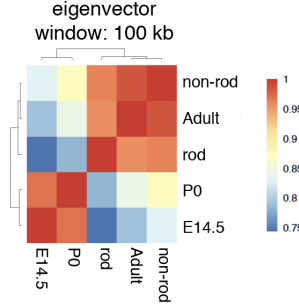

**C**

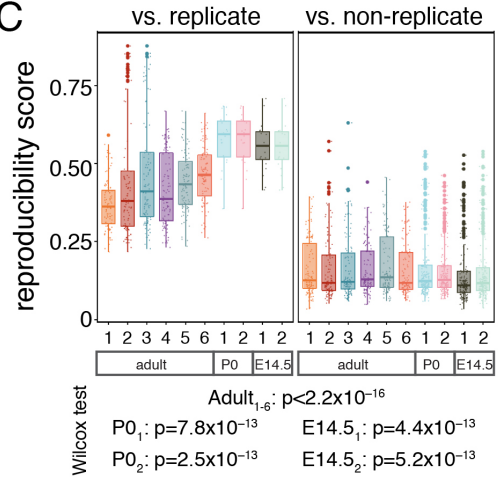

**Figure S1 related to Figure 1. Quality control for Hi-C.** **A)** Micrograph of retinal section showing nuclei (DAPI, blue) and GFP expression (green) for the Nrl-GFP mouse used to purify rod photoreceptors. **B)** Scatterplot of flow sorting for live rod photoreceptors from Nrl-GFP retinae. **C)** Boxplot of reproducibility score showing reproducibility versus the same sample type (vs. replicate) or for different sample types (vs. non-replicate). Statistical analyses are shown below the plot for each sample type. **D)** Line plot of contact frequency per distance for a 50 kb window across samples. **E-G)** Heatmaps of unsupervised hierarchical clustering of Pearson correlation, insulation score and eigenvector for the indicated window sizes.

Figure S2

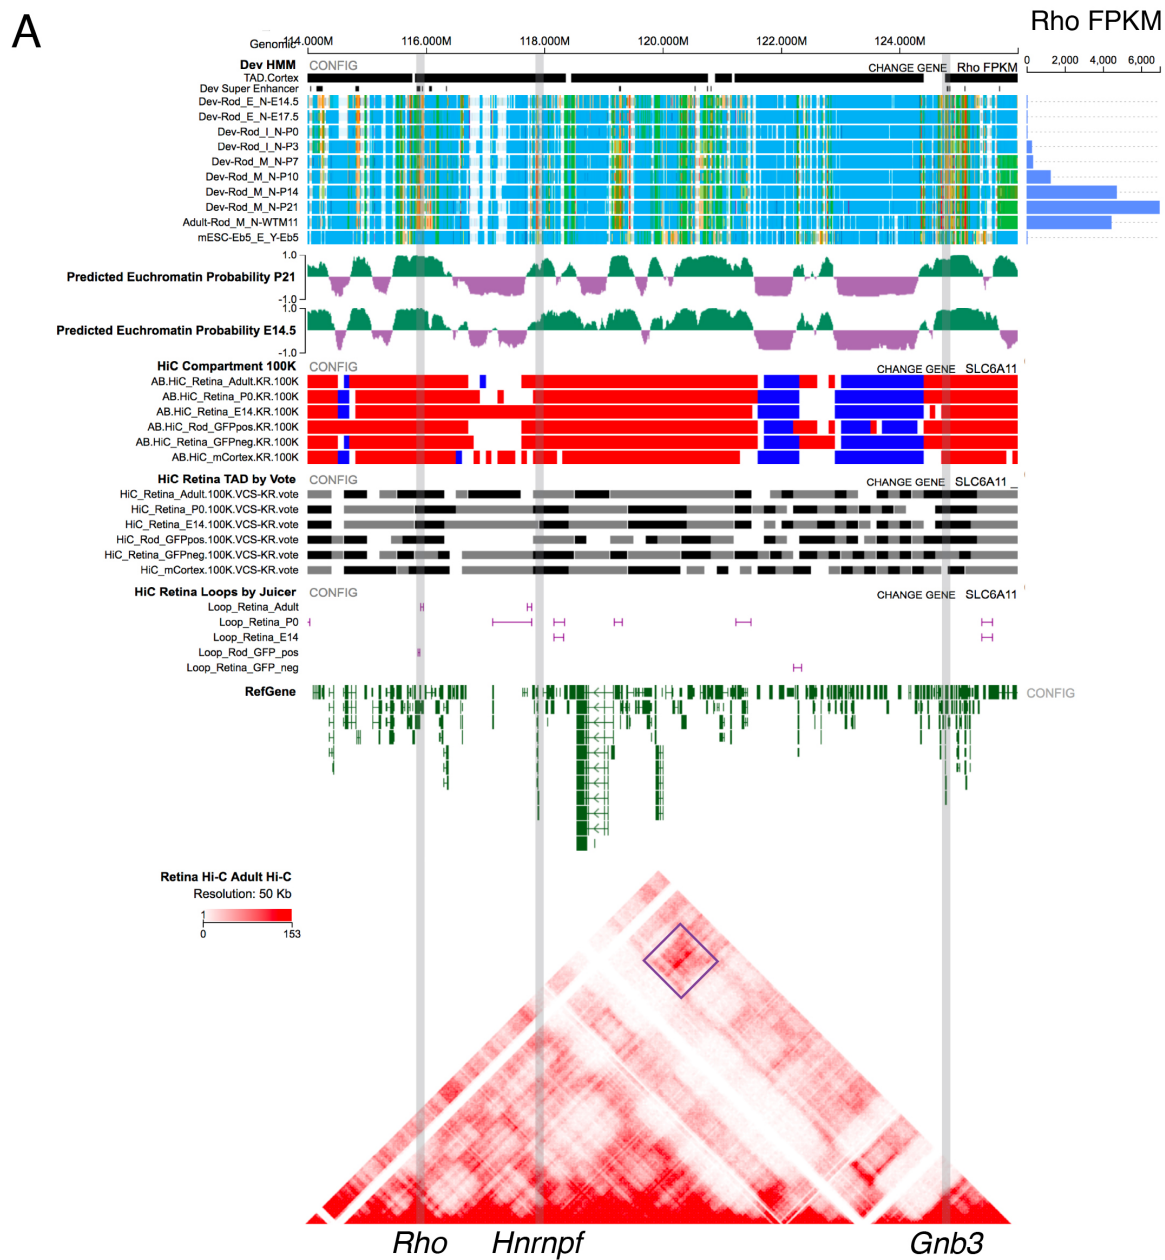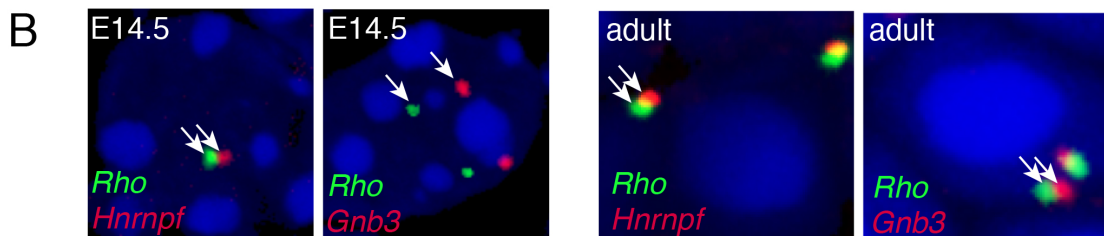

**Figure S2 related to Figure 2. Long-range interactions with the *Rho* gene locus. A,B)**

ChromHMM of the *Kcnab2* and *Rnf207* genes with gene expression (RNA-seq) showing increased expression during development. ATAC-seq and H3K4me3 ChIP-seq tracks are shown below the gene. C) ChromHMM, euchromatin/heterochromatin prediction, Hi-C compartmentalization, gene looping and Hi-C data for a 12 Mb region including the *Rho*, *Hnrnpf* and *Gnb3* genes. D) Micrographs of 2 color FISH for *Rho* (green) and *Hnrnpf* (red) or *Gnb3* (red) in E14.5 retinal progenitor cells or adult rod photoreceptors.



Figure S3

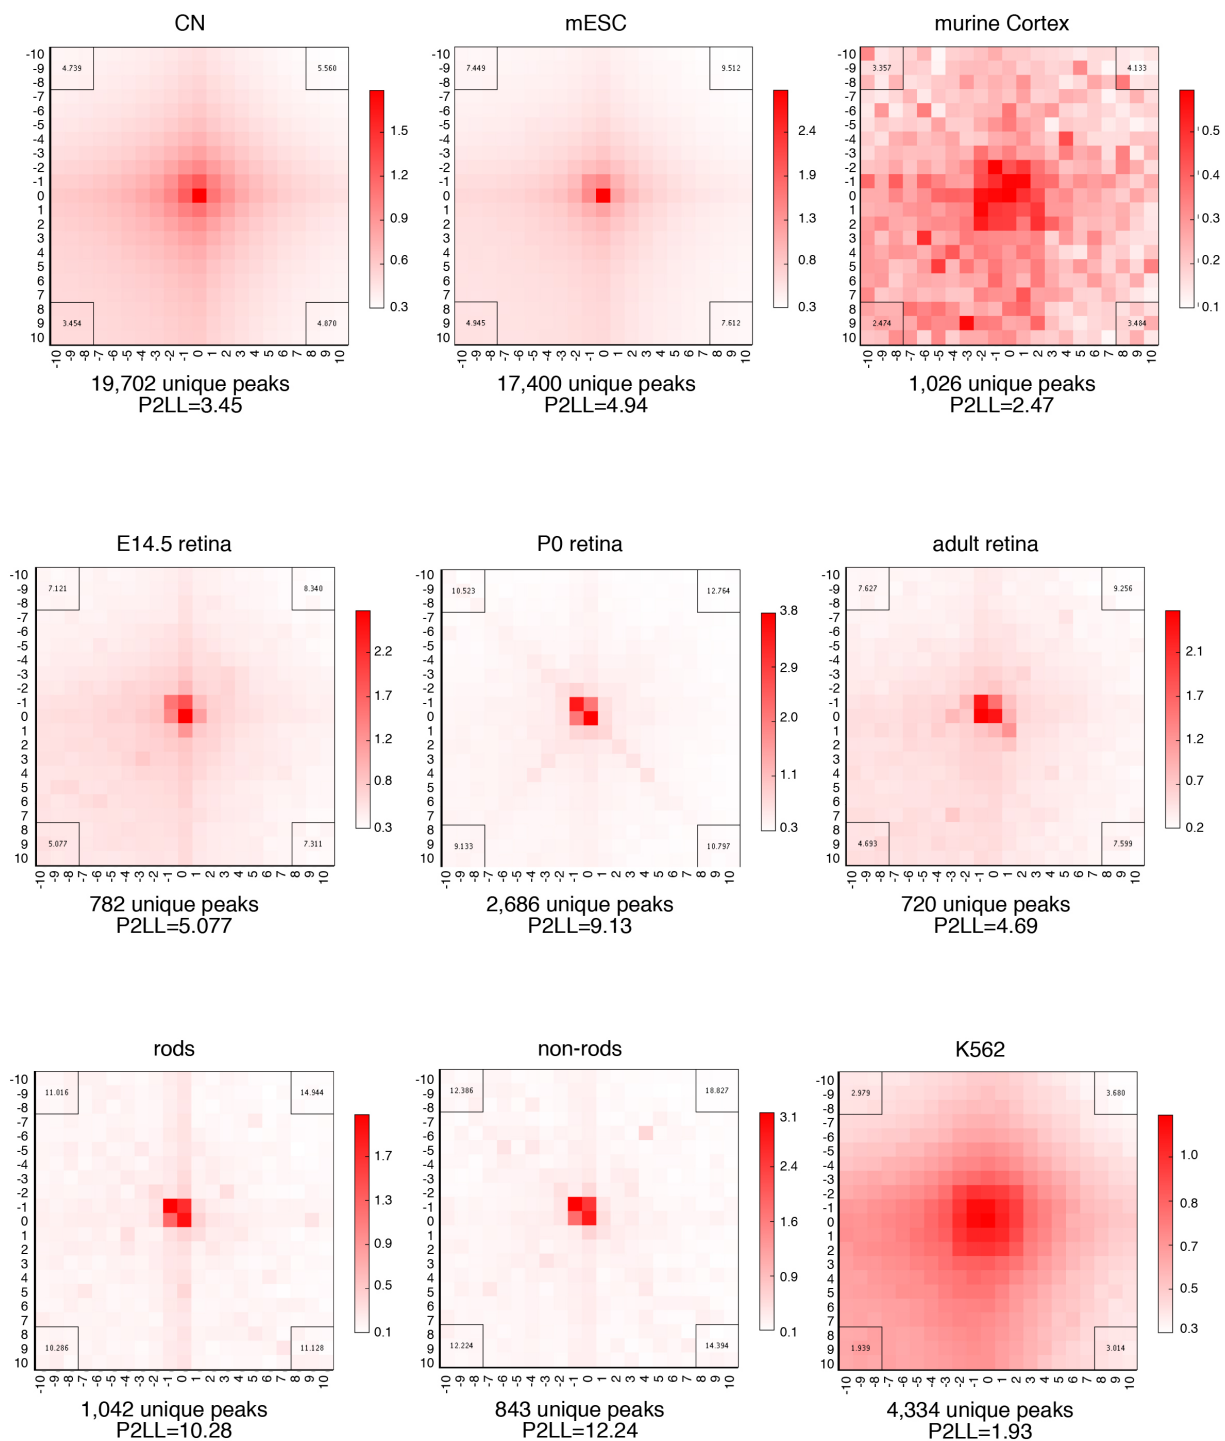

**Figure S3 related to Figure 5. APA analysis of Hi-C data.** APA plots for each sample analyzed in this study. The number of unique peaks and peak to lower left ratio (P2LL) are shown for each plot.

Figure S4

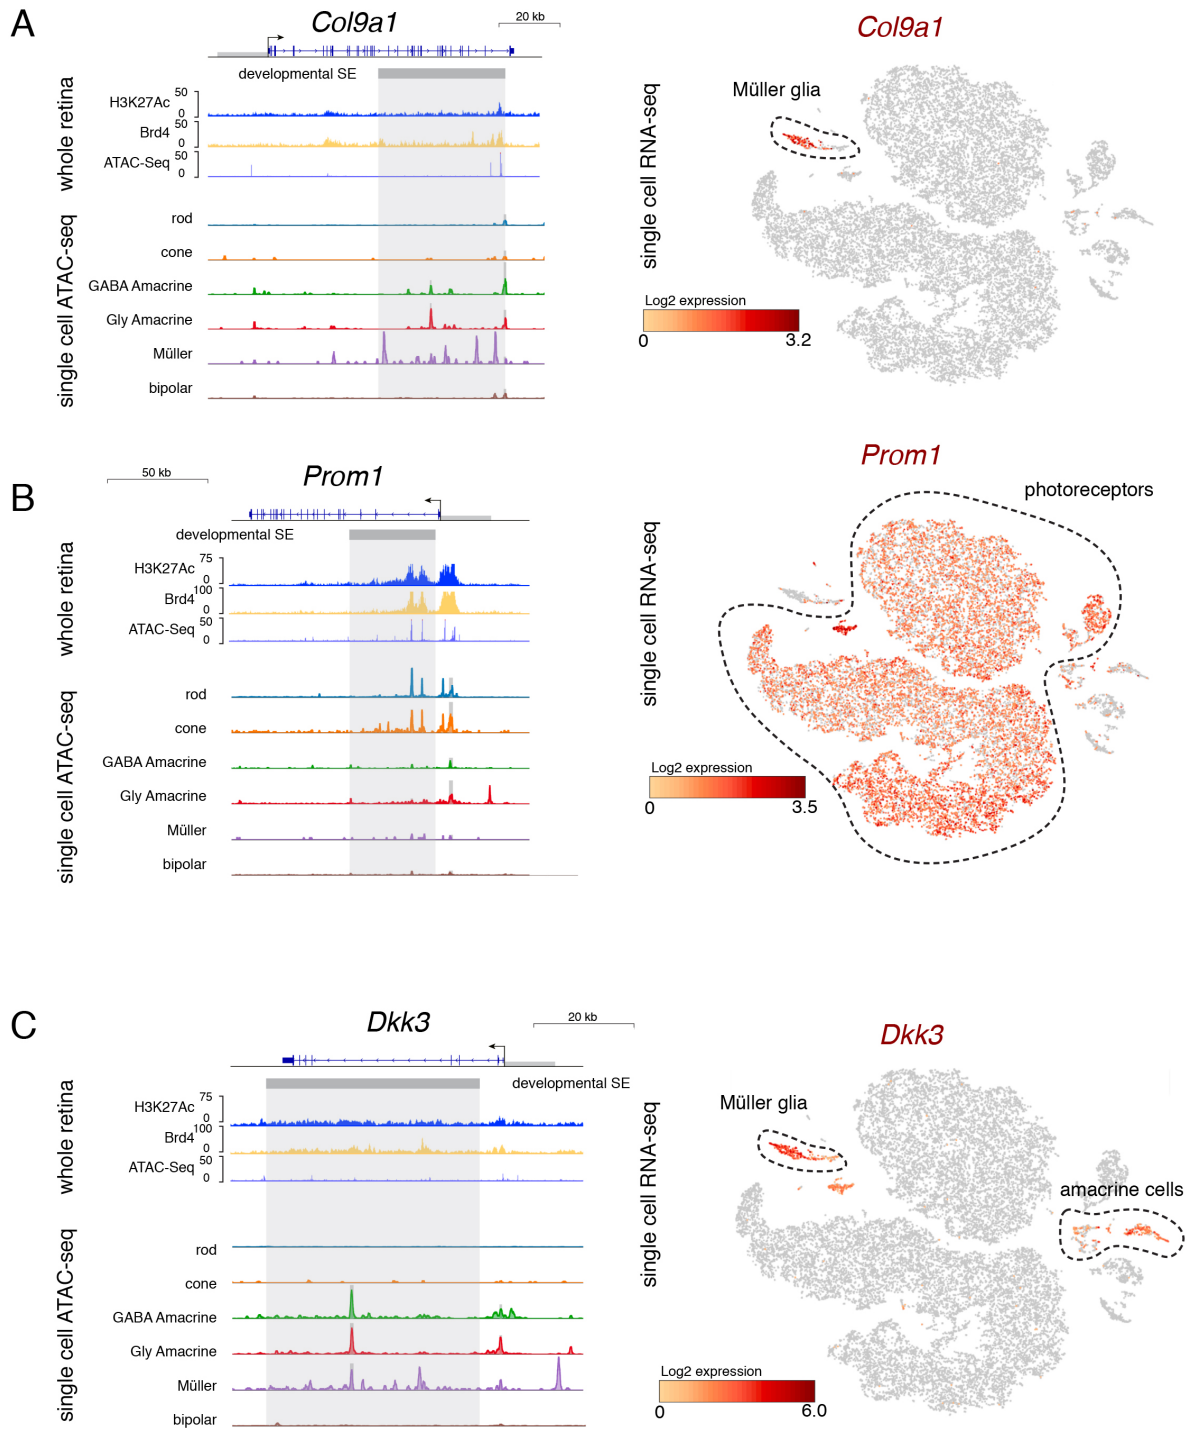

**Figure S4 related to Figure 6. Identification of cell-type specific super-enhancers. A)** Whole retina ChIP-seq and ATAC-seq for the *Col9a1* gene in adult retina with a developmental super-enhancer (SE) shown in gray. It is difficult to discern the boundaries of the SE because the gene is only expressed in Müller glia and the ChIP-seq signal is reduced in the whole retina. However, in the single cell ATAC-seq, there is a clear signal in the Müller glia with multiple peaks. **B,C)** Similar plots and maps are shown for a gene expressed specifically in photoreceptors (*Prom1*) and amacrine cells+ Müller glia (*Dkk3*).

Figure S5

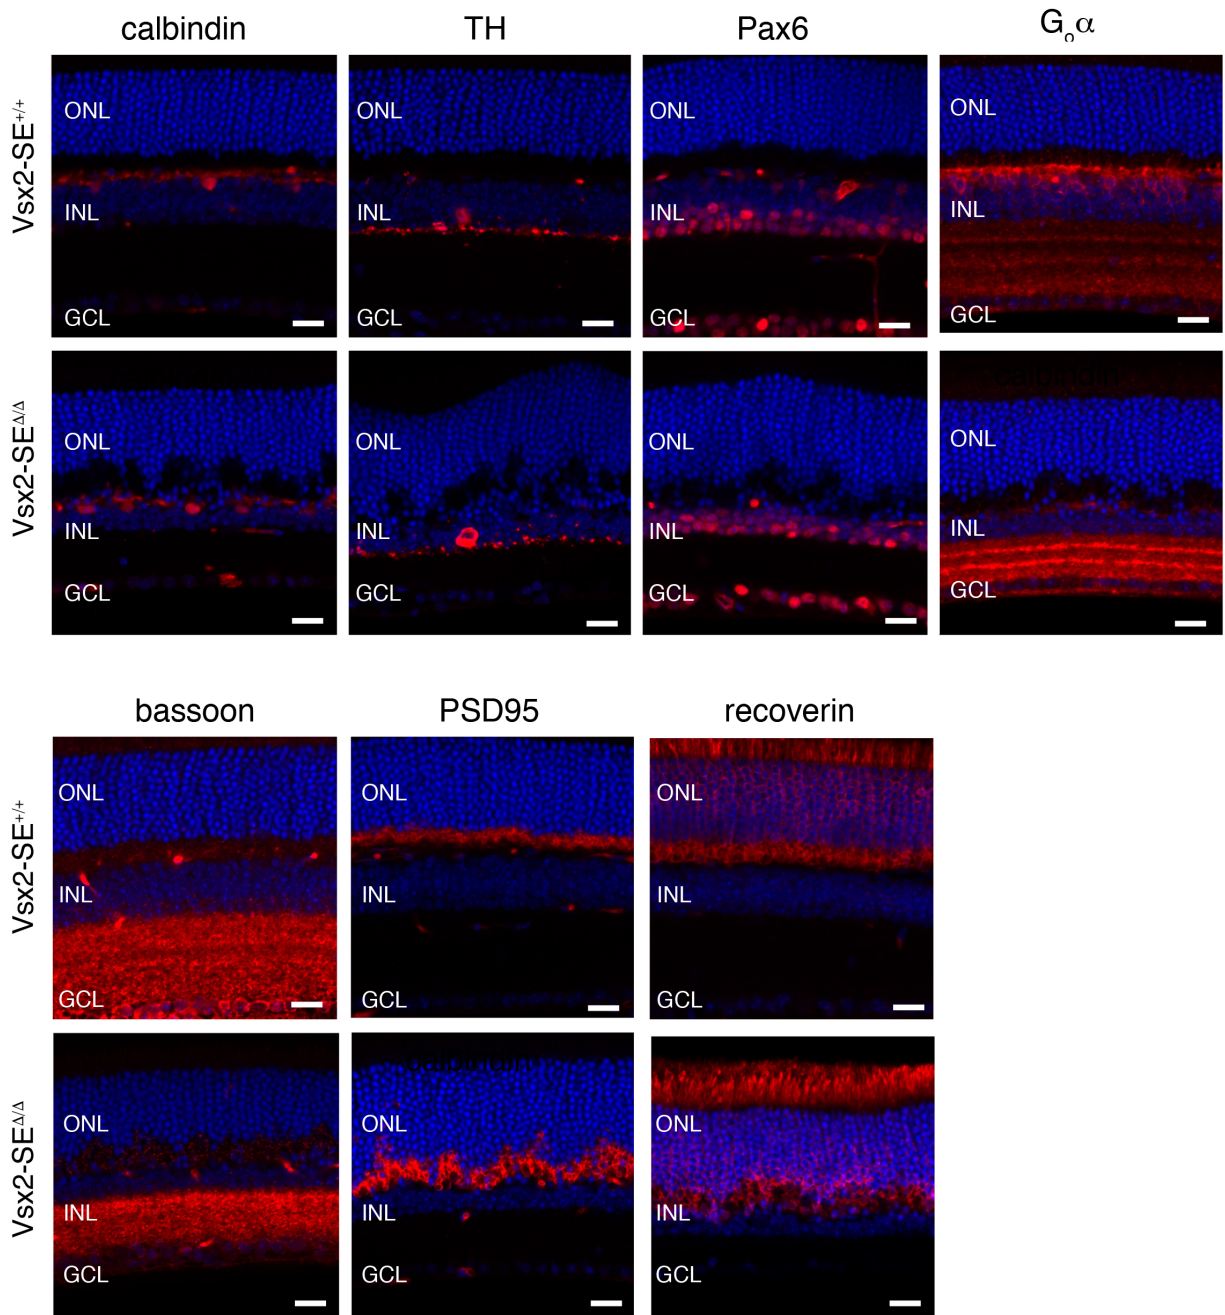

**Figure S5 related to Figure 8. Immunostaining of *Vsx2-SE<sup>4/4</sup>* retinae.** Additional immunofluorescence for horizontal cells (calbindin), dopaminergic amacrine cells (TH), amacrine cells (Pax6), bipolar cells ( $G_o\alpha$ ), synapses (bassoon and PSD95) and photoreceptors (recoverin). The sections were counterstained with DAPI (blue). Scale bars: 25  $\mu$ m.
